# Supplementary material for: Fabrication of an arbitrary-shaped and nitrogen-doped graphene aerogel for highly compressible all solid-state supercapacitors
Source: Royal Society of Chemistry journal article supplement (doi:10.1039/c7ta04917j), 2017-01-01
Supplement: c7ta04917j5.pdf [file c7ta04917j5.pdf]

## Supporting Information

### **Fabrication of Arbitrary-Shaped and Nitrogen-Doped Graphene Aerogel for Highly Compressible All Solid-State Supercapacitors**

Degang Jiang <sup>†a</sup>, Chenwei Li <sup>†a</sup>, Wenrong Yang <sup>b</sup>, Jizhen Zhang <sup>b</sup>, Jingquan Liu<sup>\*a</sup>

<sup>a</sup> College of Materials Science and Engineering, Institute for Graphene Applied Technology Innovation, Qingdao University, Ningxia Road 308 Qingdao 266071, P. R. China.

E-mail: [jliu@qdu.edu.cn](mailto:jliu@qdu.edu.cn) (Jingquan Liu)

<sup>b</sup> School of Life and Environmental Sciences, Deakin University, Melbourne VIC 3217, Australia

<sup>†</sup> Degang Jiang and Chenwei Li contributed equally to this work.

---

## Characterizations

TEM image was obtained using a JEM-2100F electron microscope with an accelerating voltage of 200 kV. The morphology of the as-prepared samples was investigated by JEOL 6701 field-emission scanning electron microscope (JEOL 6701, Japan), with energy dispersive X-ray spectroscopy to investigate the morphology and structure of the samples. The XPS spectra of as-prepared samples were examined on a PerkinElmer PHI-5702 multifunctional X-ray photoelectron spectroscope (XPS, Physical Electronics, USA). The structures of the as-prepared samples were analyzed with XRD (DX2700, China) at a scan rate ( $2\theta$ ) of  $2^\circ \text{ min}^{-1}$  ranging from  $5^\circ$  to  $80^\circ$ , operating at Cu K $\alpha$  radiation ( $\lambda=1.5418 \text{ \AA}$ ) with an accelerating voltage of 40 kV and an applied current of 30 mA. The compressive tests were performed with a rheometer (ARES-G2, TA Instruments, USA) in the axial-compression testing mode at a strain rate of  $100\% \text{ strain min}^{-1}$ , and all the graphene aerogel samples were tested at room temperature. All the electrochemical tests were performed using a CHI 760E electrochemical workstation.

## Calculations

The specific capacitances of the GASC were calculated from their GCDs which were carried out on symmetrical supercapacitor systems according to the following equation:

$$C = \frac{2I\Delta t}{m\Delta V} \quad (1)$$

Where C is the specific capacitance ( $\text{F g}^{-1}$ ), I is the discharge current (A),  $\Delta t$  is the discharge time (s), m (g) is the mass of single GA electrode and  $\Delta V$  is the voltage window (V).

The energy density and power density of symmetrical supercapacitor systems were calculated using the following equations:

---


$$E = \frac{C_t \Delta V^2}{2 \times 3.6}$$

$$(2) \quad P = \frac{E}{t}$$

$$(3)$$

Where E (Wh kg<sup>-1</sup>) is the energy density, P (W kg<sup>-1</sup>) is the power density of the symmetrical GASC system, C<sub>t</sub> (F g<sup>-1</sup>) is the specific capacitance of the whole symmetrical GASC system, which is equal to C/2. ΔV (V) is the voltage window, and t (h) is the discharge time, respectively.

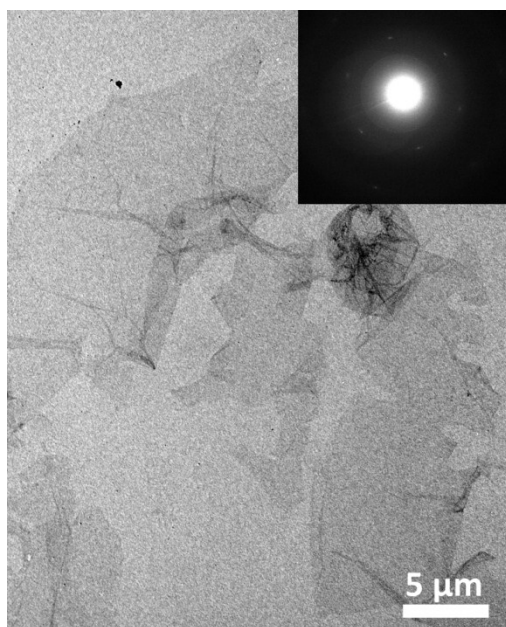

**Figure S1.** TEM image of graphene oxide (GO). The inset is the selected-area electron diffraction (SAED) pattern.

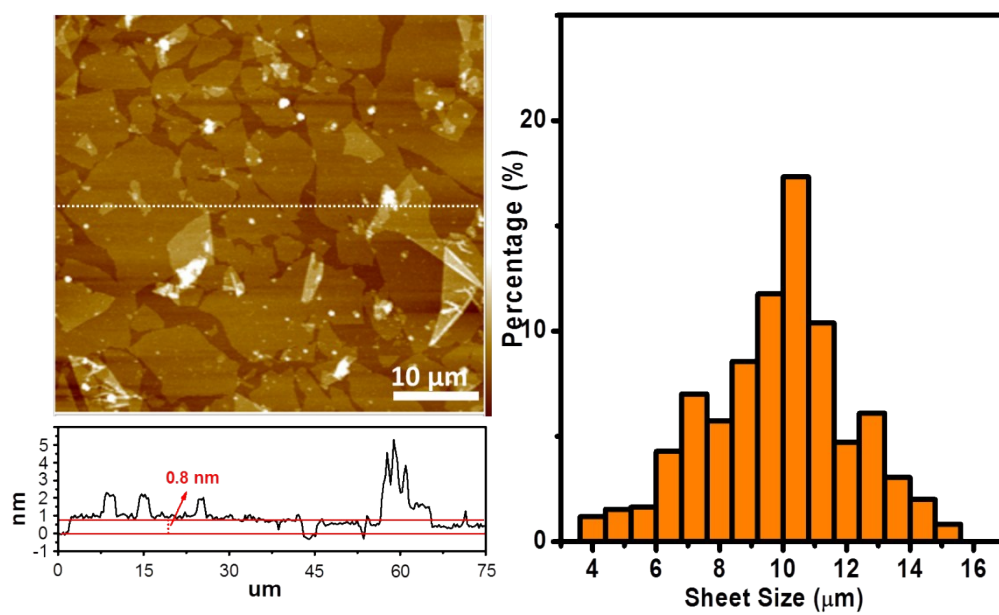

**Figure S2.** AFM image of graphene oxide (GO) and the sheet size distribution.

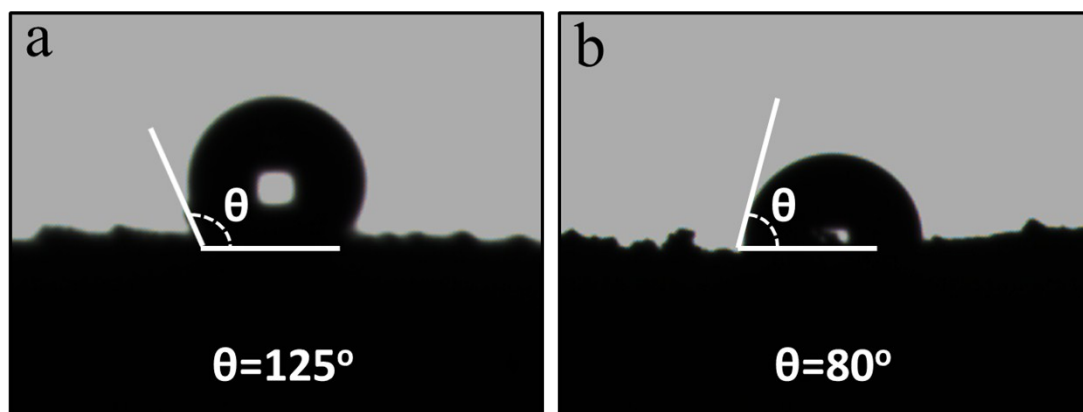

**Figure S3.** The water contact angle measurement for a) GMF, b) the nitrogen-doped GA.

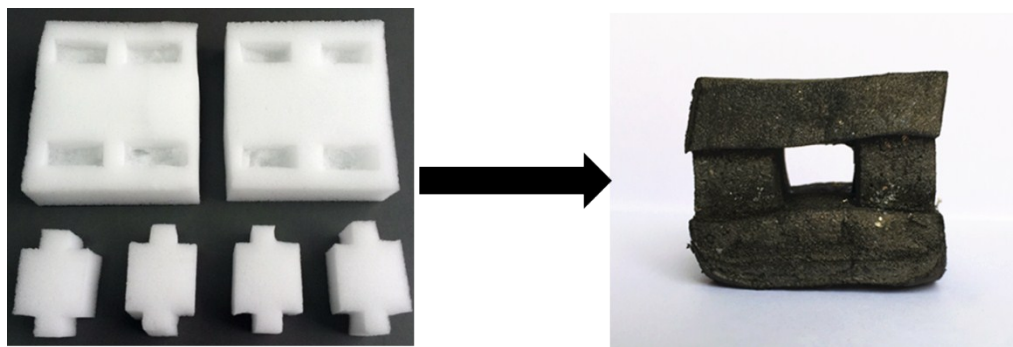

**Figure S4.** The fabrication of 3-D structured GA cube from special designed MF components.

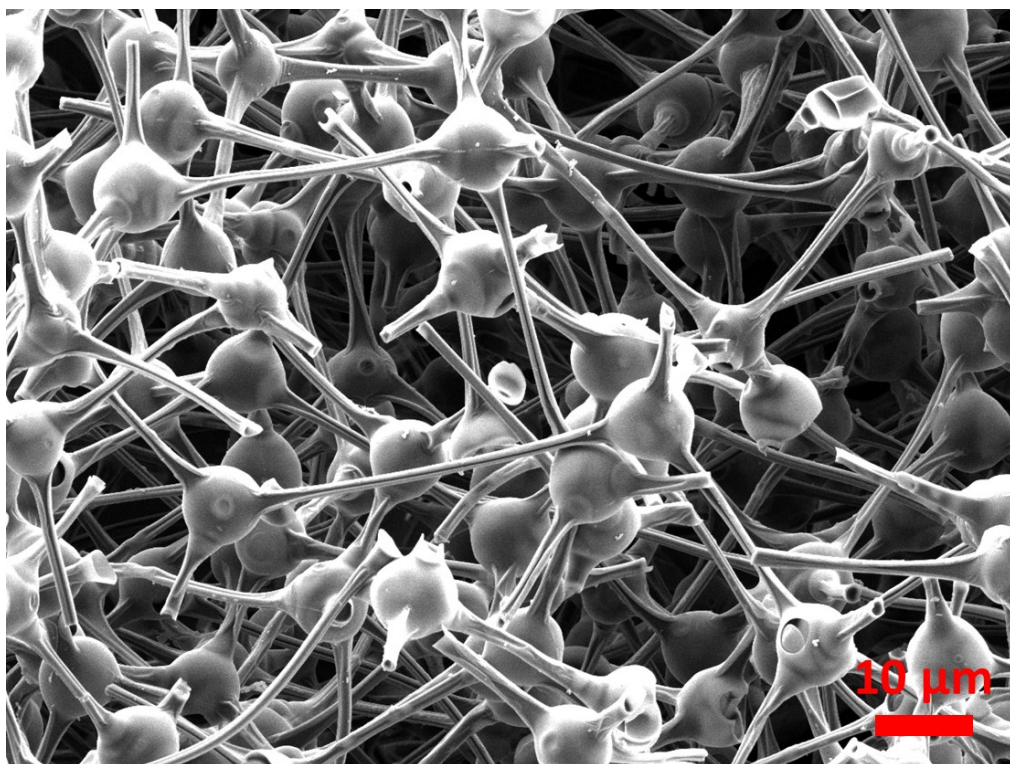

**Figure S5.** SEM image of the carbonized MF (CMF).

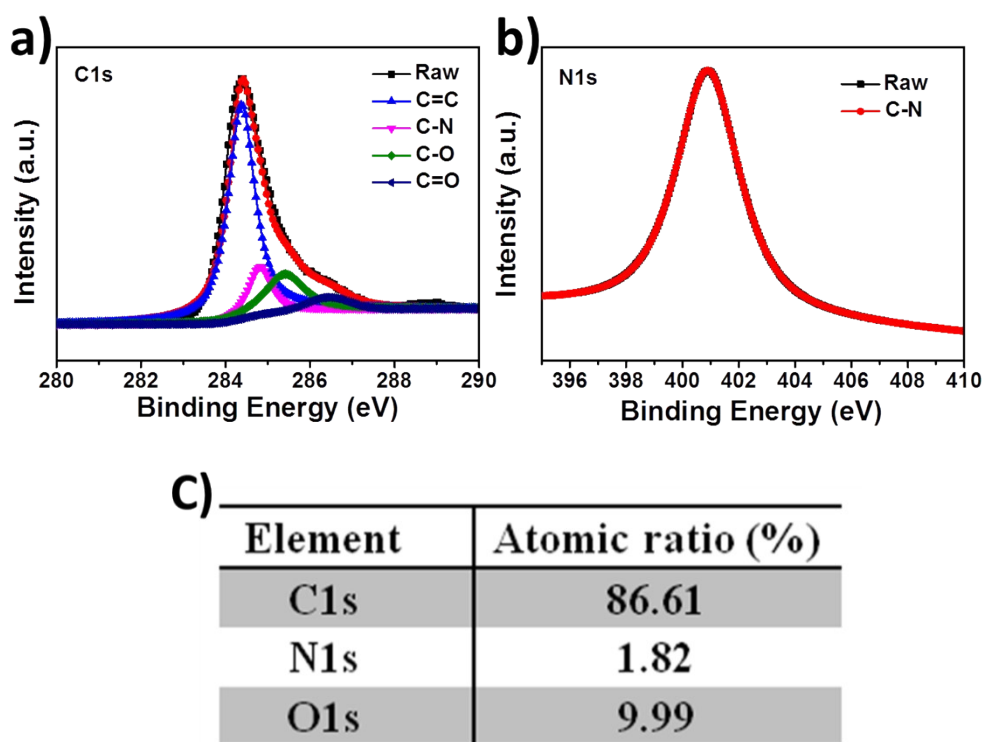

**Figure S6.** XPS spectra for a) C1s, b) N1s of nitrogen-doped GA. c) The atomic ratio of C, N and O in GA.

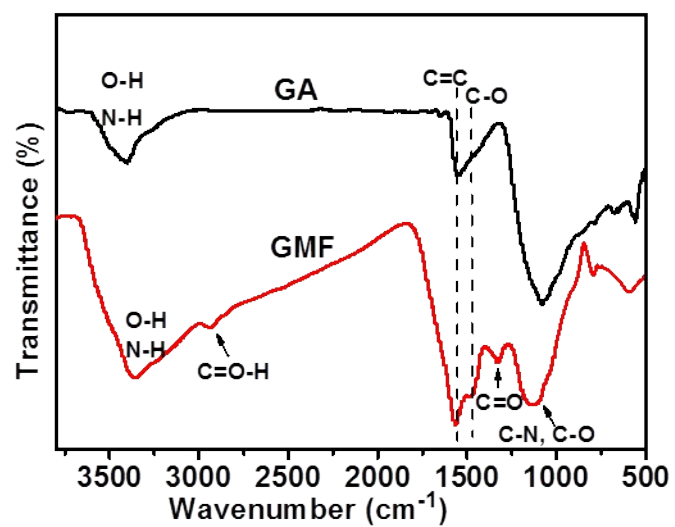

**Figure S7.** FTIR transmittance spectra of GMF and GA.

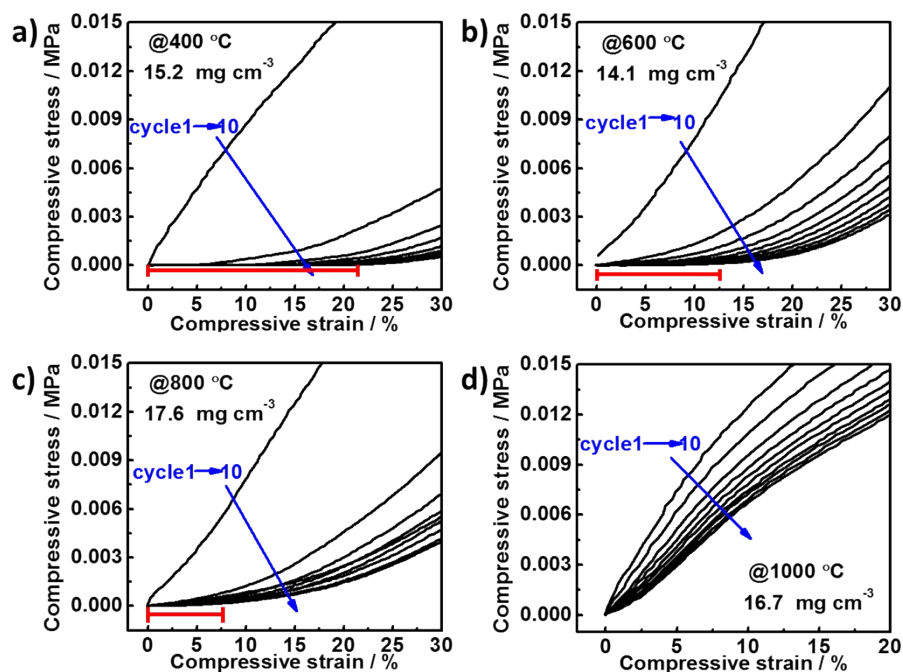

**Figure S8.** Cyclic compressive stress-strain curves under the strain of 80% (the enlarged images at low stress area) of GA annealed at different temperature : (a) at 400 °C; (b) at 600 °C; (c) at 800 °C and (d) at 1000 °C.

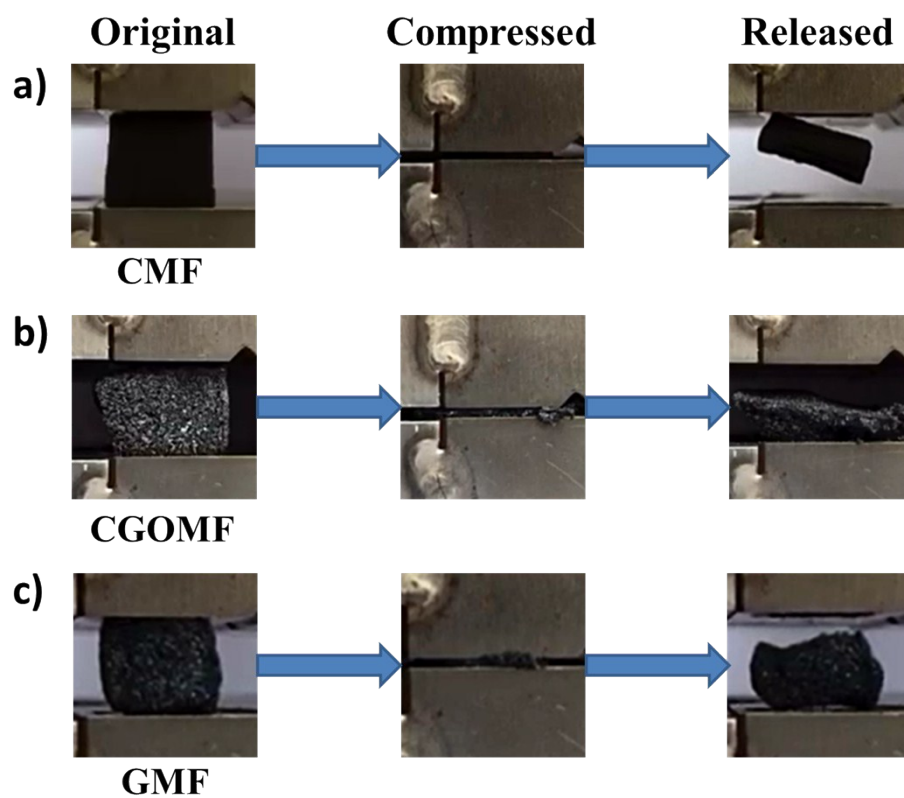

**Figure S9.** The digital images showing compressibility of CMF, CGOMF, and GMF, respectively.

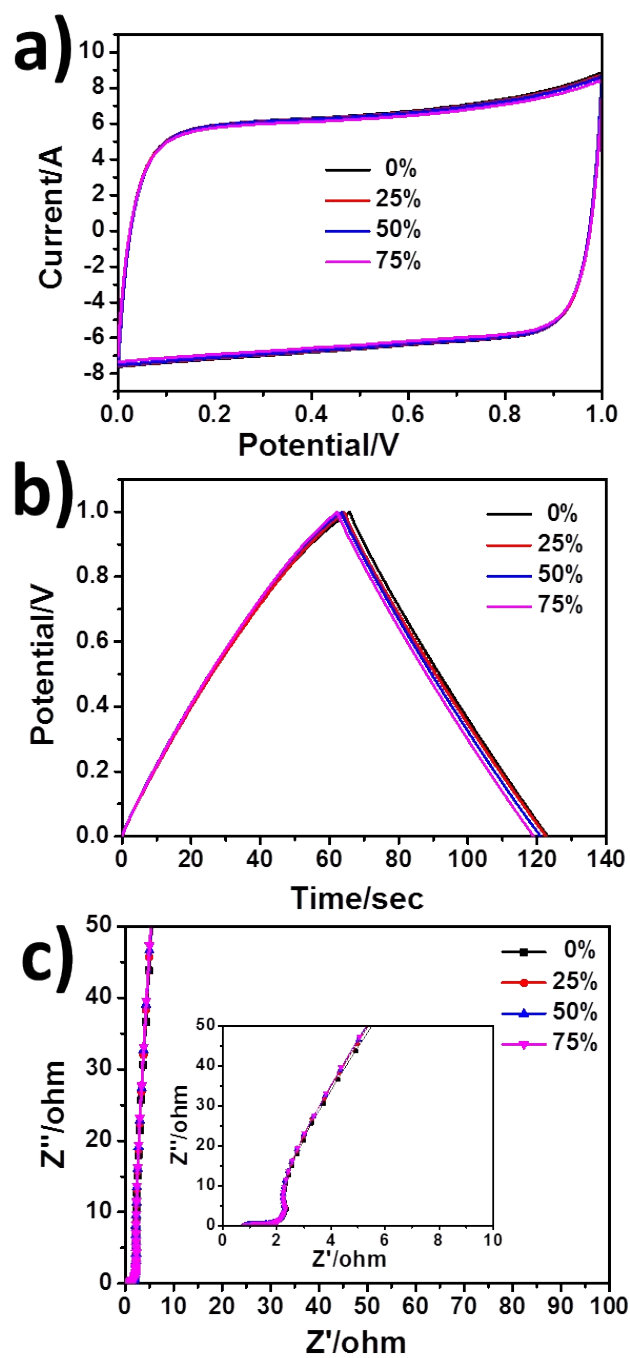

**Figure S10.** a) The CV curves, b) galvanostatic charge-discharge curves and c) Nyquist plots of GASC under different compressible strains.

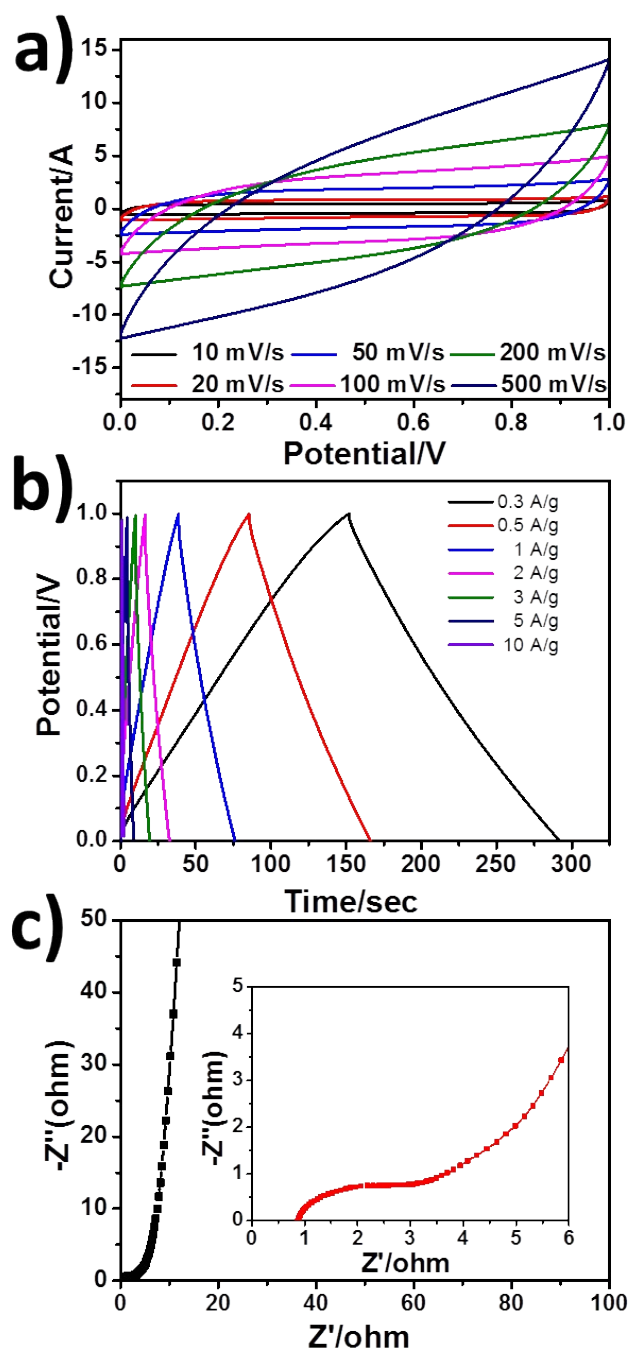

**Figure S11.** a) The CV curves, b) galvanostatic charge-discharge curves and c) Nyquist plots of CMF electrodes.

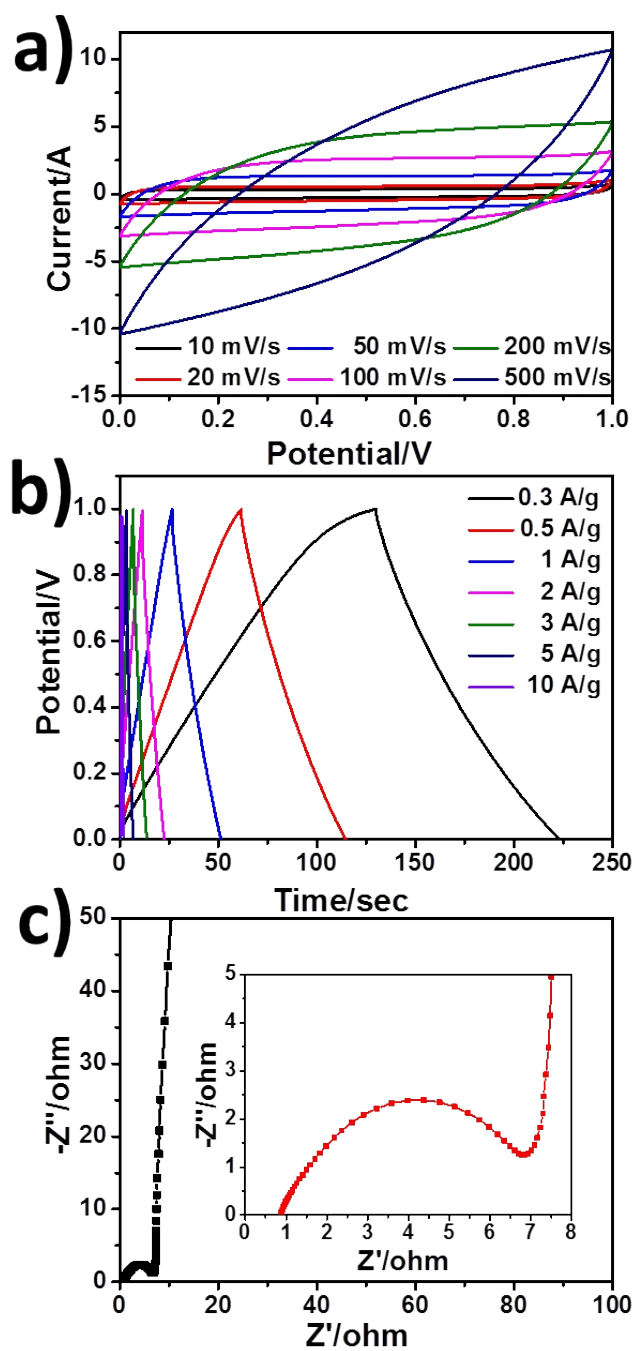

**Figure S12.** a) The CV curves, b) galvanostatic charge-discharge curves and c) Nyquist plots of GMF electrodes.

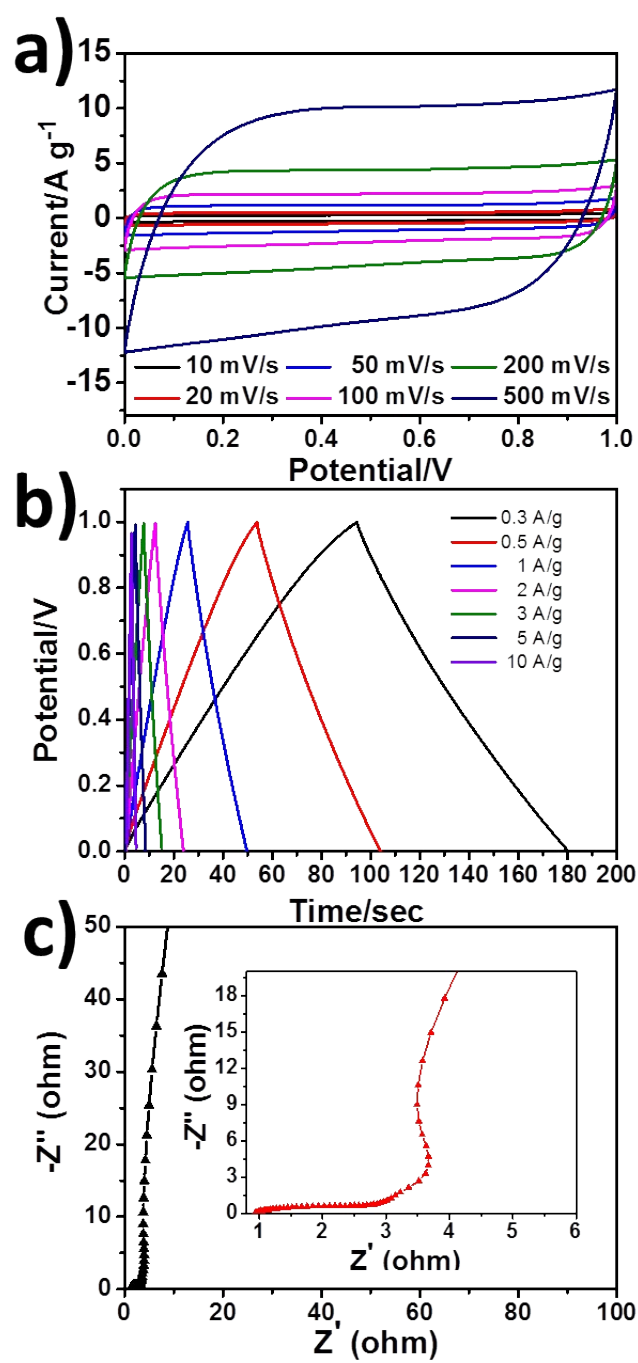

**Figure S13.** a) The CV curves, b) galvanostatic charge-discharge curves and c) Nyquist plots of CGOMF electrodes.

(a)

| Sample                             | CMF | GMF | CGOMF | GA   |
|------------------------------------|-----|-----|-------|------|
| Conductivity ( $\text{S m}^{-1}$ ) | 8.5 | 2.1 | 3.0   | 67.2 |

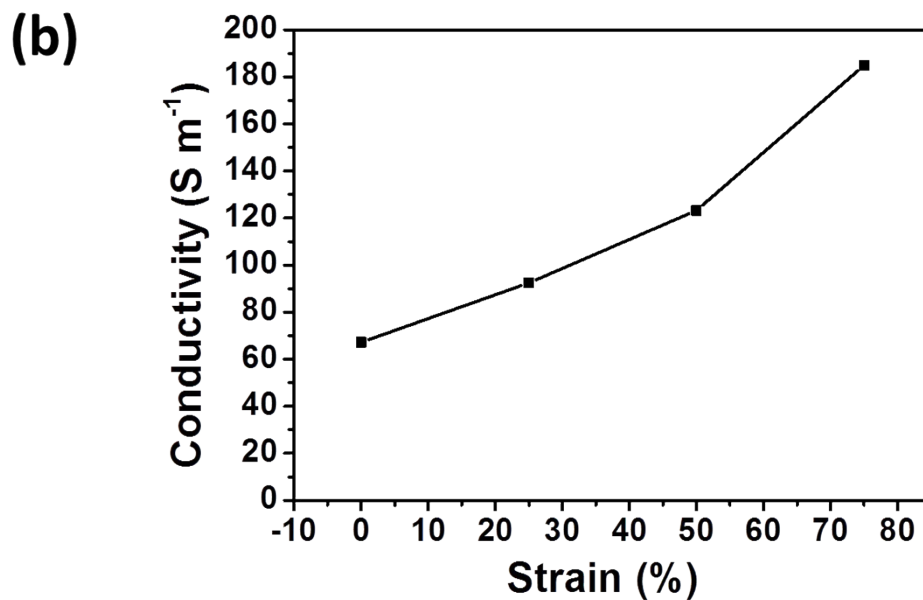

**Figure S14.** (a) The conductivity of CMF, GMF, CGOMF and GA. (b) The conductivity of GA under different compressible strains.

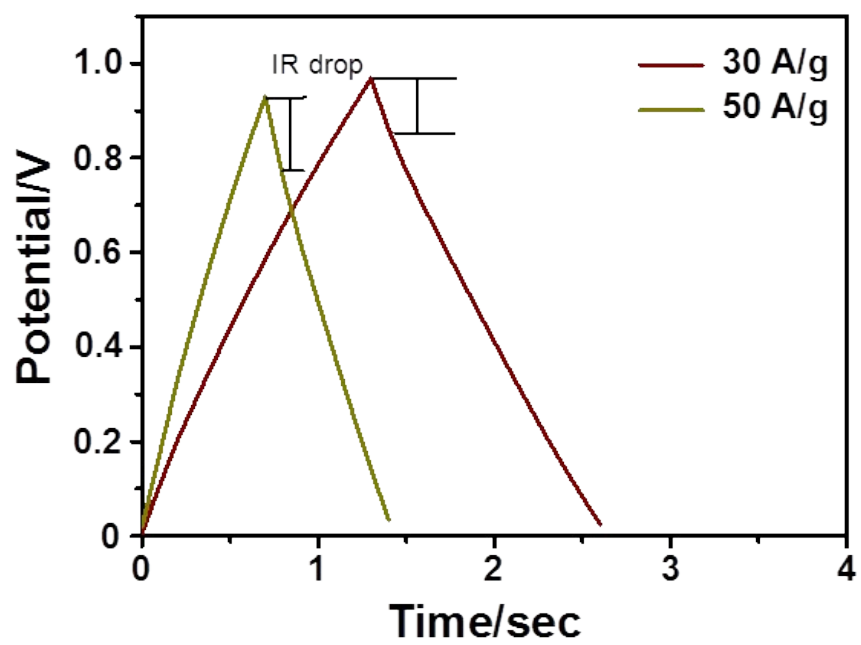

**Figure S15.** The charge-discharge curves of GA electrodes at 30 and 50 A g<sup>-1</sup>.

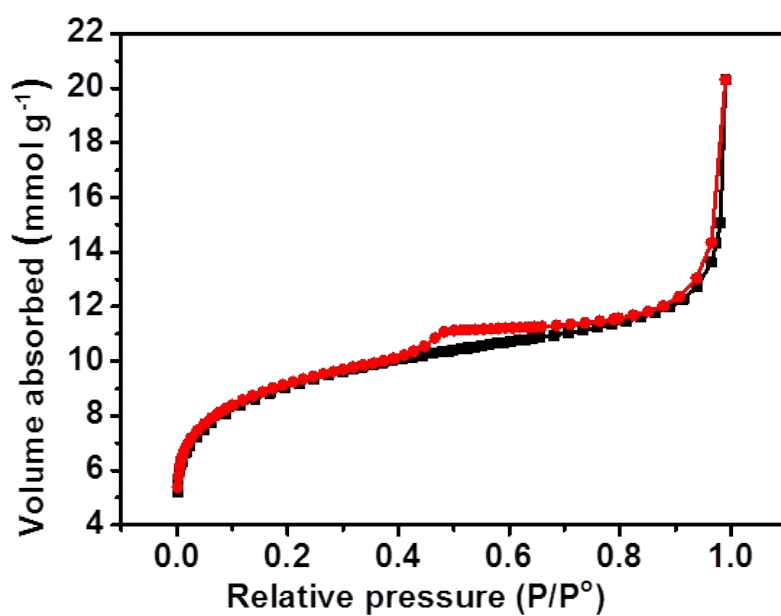

**Figure S16.** The N<sub>2</sub> adsorption-desorption isotherms of GA.

**Table S1.** Specific capacitance values and maximum compression obtained with various electrode materials

| Electrode                      | Specific Capacitance<br>(F g <sup>-1</sup> ) | Maximum Compression<br>(%) | Ref       |
|--------------------------------|----------------------------------------------|----------------------------|-----------|
| Graphene aerogel               | 150                                          | 90                         | This work |
| CNC-MWCNT-PPy                  | 45.6                                         | 80                         | 1         |
| CNT-graphene                   | 103                                          | 50                         | 2         |
| CNT-graphene-ppy               | 225                                          | 50                         | 2         |
| CNF aerogel                    | 25                                           | 75                         | 3         |
| Graphene-CNT                   | 70                                           | 90                         | 4         |
| PANI-SWCNT sponge              | 216                                          | 60                         | 5         |
| Graphene aerogel               | 144                                          | 70                         | 6         |
| CNT sponge                     | 10.1                                         | 60                         | 7         |
| CNT-PPy                        | 255.4                                        | 60                         | 7         |
| CNT sponge                     | 29.3                                         | 50                         | 8         |
| CNT-MnO <sub>2</sub>           | 183.7                                        | 50                         | 8         |
| Graphene-PPy                   | 220                                          | 80                         | 9         |
| Macro/Mesoporous<br>CNT sponge | 143                                          | 60                         | 10        |
| Carbon foam                    | 52                                           | 60                         | 11        |
| GNR-PU                         | 87.5                                         | 80                         | 12        |
| RGO aerogel                    | 110                                          | 60                         | 13        |
| CNT sponge                     | 80.2                                         | 70                         | 14        |

## Reference

1. K. Y. Shi, X. Yang, E. D. Cranston and I. Zhitomirsky, *Adv. Funct. Mater.*, 2016, **26**, 6437-6445.
2. Y. Zhang, Z. Zhen, Z. Zhang, J. Lao, J. Wei, K. Wang, F. Kang and H. Zhu, *Electrochim. Acta*, 2015, **157**, 134-141.
3. G. Nystrom, A. Marais, E. Karabulut, L. Wagberg, Y. Cui and M. M. Hamed, *Nat. Commun.*, 2015, **6**.
4. E. Wilson and M. F. Islam, *Acs Applied Materials & Interfaces*, 2015, **7**, 5612-5618.
5. Z. Q. Niu, W. Y. Zhou, X. D. Chen, J. Chen and S. S. Xie, *Adv. Mater.*, 2015, **27**, 6002-6008.
6. S. Ye and J. Feng, *Acs Applied Materials & Interfaces*, 2014, **6**, 9671-9679.
7. P. Li, E. Shi, Y. Yang, Y. Shang, Q. Peng, S. Wu, J. Wei, K. Wang, H. Zhu, Q. Yuan, A. Cao and D. Wu, *Nano Res.*, 2014, **7**, 209-218.
8. P. Li, Y. Yang, E. Shi, Q. Shen, Y. Shang, S. Wu, J. Wei, K. Wang, H. Zhu, Q. Yuan, A. Cao and D. Wu, *Acs Applied Materials & Interfaces*, 2014, **6**, 5228-5234.

- 
9. Y. Zhao, J. Liu, Y. Hu, H. Cheng, C. Hu, C. Jiang, L. Jiang, A. Cao and L. Qu, *Adv. Mater.*, 2013, **25**, 591-595.
  10. Y. B. Yang, P. X. Li, S. T. Wu, X. Y. Li, E. Z. Shi, Q. C. Shen, D. H. Wu, W. J. Xu, A. Y. Cao and Q. Yuan, *Chem.-Eur. J.*, 2015, **21**, 6157-6164.
  11. K. Xiao, L. X. Ding, G. X. Liu, H. B. Chen, S. Q. Wang and H. H. Wang, *Adv. Mater.*, 2016, **28**, 5997.
  12. Y. J. Ding, J. Q. Zhu, C. H. Wang, B. Dai, Y. X. Li, Y. Y. Qin, F. Xu, Q. Y. Peng, Z. Z. Yang, J. Bai, W. X. Cao, Y. Yuan and Y. B. Li, *Carbon*, 2016, **104**, 133-140.
  13. J.-Y. Hong, B. M. Bak, J. J. Wie, J. Kong and H. S. Park, *Adv. Funct. Mater.*, 2015, **25**, 1053-1062.
  14. X. Cheng, X. Gui, Z. Lin, Y. Zheng, M. Liu, R. Zhan, Y. Zhu and Z. Tang, *J. Mater. Chem. A*, 2015, **3**, 20927-20934.
